# Supplementary material for: Effect of Torcetrapib on Carotid Atherosclerosis in Familial Hypercholesterolemia
Source: Atypon-hosted journal article supplement (doi:10.1056/nejmoa071359), 2007-03-27
Supplement: nejm_kastelein_1620sa1.pdf [file nejm_kastelein_1620sa1.pdf]

## Supplementary Appendix

This appendix has been provided by the authors to give readers additional information about their work.

Supplement to: Kastelein JJP, van Leuven SI, Burgess L, et al. Effect of torcetrapib on carotid atherosclerosis in familial hypercholesterolemia. *N Engl J Med* 2007;356:1620-30.

# RADIANCE 1

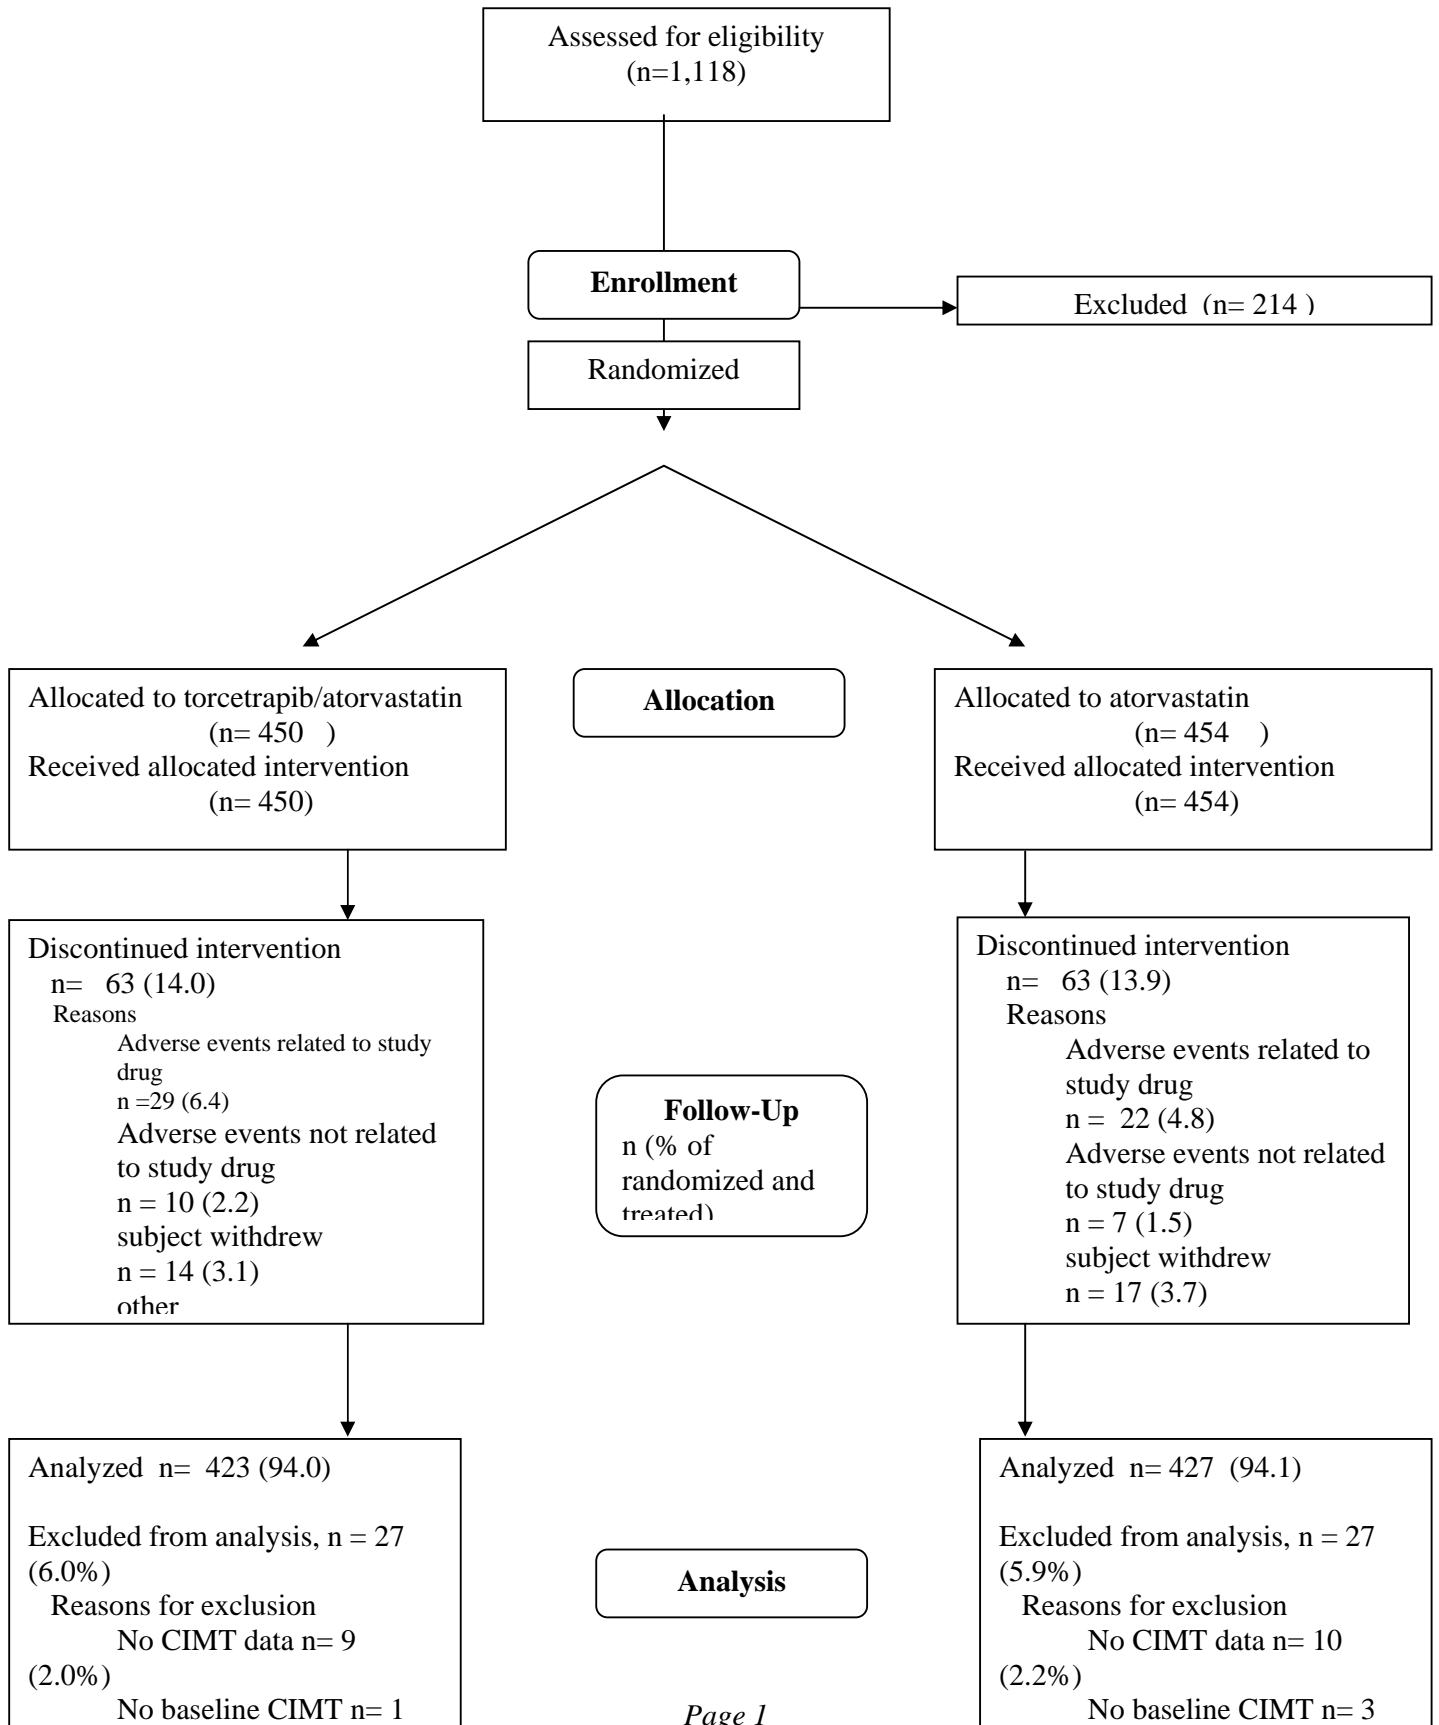

Appendix 2. Table of adverse events

Treatment-Emergent Adverse Events by System Organ Class (All Causalities)

|                                                                     | T/A        | A          |
|---------------------------------------------------------------------|------------|------------|
|                                                                     | n (%)      | n (%)      |
| -----                                                               |            |            |
| Number (%) of Subjects:                                             |            |            |
| Evaluable for adverse events                                        | 450        | 454        |
| With adverse events                                                 | 386 (85.8) | 385 (84.8) |
| Discontinued due to adverse events                                  | 40 (8.9)   | 27 (5.9)   |
| -----                                                               |            |            |
| Number (%) of Subjects with Adverse Events by System Organ Class:   |            |            |
| Blood and lymphatic system disorders                                | 7 (1.6)    | 6 (1.3)    |
| Cardiac disorders                                                   | 32 (7.1)   | 21 (4.6)   |
| Congenital, familial and genetic disorders                          | 0          | 1 (0.2)    |
| Ear and labyrinth disorders                                         | 11 (2.4)   | 7 (1.5)    |
| Endocrine disorders                                                 | 0          | 4 (0.9)    |
| Eye disorders                                                       | 15 (3.3)   | 16 (3.5)   |
| Gastrointestinal disorders                                          | 131 (29.1) | 109 (24.0) |
| General disorders and administration site conditions                | 59 (13.1)  | 57 (12.6)  |
| Hepatobiliary disorders                                             | 2 (0.4)    | 9 (2.0)    |
| Immune system disorders                                             | 9 (2.0)    | 8 (1.8)    |
| Infections and infestations                                         | 227 (50.4) | 215 (47.4) |
| Injury, poisoning and procedural complications                      | 60 (13.3)  | 55 (12.1)  |
| Investigations                                                      | 49 (10.9)  | 44 (9.7)   |
| Metabolism and nutrition disorders                                  | 14 (3.1)   | 18 (4.0)   |
| Musculoskeletal and connective tissue disorders                     | 156 (34.7) | 145 (31.9) |
| Neoplasms benign, malignant and unspecified (incl cysts and polyps) | 12 (2.7)   | 14 (3.1)   |
| Nervous system disorders                                            | 107 (23.8) | 94 (20.7)  |
| Pregnancy, puerperium and perinatal conditions                      | 3 (0.7)    | 3 (0.7)    |
| Psychiatric disorders                                               | 32 (7.1)   | 26 (5.7)   |
| -----                                                               |            |            |
